# Supplementary material for: Characterization of MicroRNAs from Orientobilharzia turkestanicum, a Neglected Blood Fluke of Human and Animal Health Significance
Source: PubMed Central journal article supplement (PMC3468544; doi:10.1371/journal.pone.0047001), 2012-10-10
Supplement: pone.0047001.s001.pdf [file pone.0047001.s001.pdf]

## Additional file 1. Targets analysis of all miRNAs of *Orientobilharzia turkestanicum*

| Name                | Length | Mfe<br>(kcal/mol) | Number<br>of targets | Name of Best matched Target                                           | KEGG Orthology |
|---------------------|--------|-------------------|----------------------|-----------------------------------------------------------------------|----------------|
| <b>Novel miRNAs</b> |        |                   |                      |                                                                       |                |
| Otu-miR-01          | 20     | -30.2             | 66                   | Lipopolysaccharide-induced tumor necrosis factor-alpha factor homolog | /              |
| Otu-miR-02          | 22     | -37.3             | 57                   | hypothetical protein                                                  | /              |
| Otu-miR-03          | 20     | -30               | 2                    | /                                                                     | /              |
| Otu-miR-04          | 20     | -42.1             | 21                   | Conserved hypothetical protein                                        | /              |
| Otu-miR-05          | 20     | -29.4             | 35                   | Heterogeneous nuclear ribonucleoprotein A2 homolog 1                  | /              |
| Otu-miR-06          | 20     | -27.2             | 59                   | hypothetical protein                                                  | /              |
| Otu-miR-07          | 20     | -26.9             | 1                    | hypothetical protein                                                  | /              |
| <b>Known miRNAs</b> |        |                   |                      |                                                                       |                |
| miR-1*              | 22     | -29.3             | 1270                 | /                                                                     | /              |
| miR-23*             | 21     | -36.6             | 905                  | /                                                                     | /              |
| miR-1721            | 19     | -34.4             | 673                  | Transmembrane protein 45B                                             | /              |
| miR-2303            | 21     | -31.5             | 637                  | /                                                                     | /              |
| miR-2885            | 22     | -40.3             | 354                  | U1 small nuclear ribonucleoprotein A                                  | /              |
| miR-595             | 20     | -28.9             | 239                  | hypothetical protein                                                  | /              |
| miR-361*            | 25     | -27.9             | 202                  | H <sup>+</sup> -transporting ATPase                                   | /              |
| miR-3615            | 19     | -36.5             | 190                  | /                                                                     | /              |
| miR-3201            | 20     | -32               | 187                  | /                                                                     | /              |
| miR-2881            | 20     | -43.3             | 175                  | Splicing factor 3A subunit 2                                          | /              |
| miR-1591            | 25     | -40.2             | 171                  | /                                                                     | /              |

|              |    |       |     |                                                                                  |                                               |
|--------------|----|-------|-----|----------------------------------------------------------------------------------|-----------------------------------------------|
| miR-2305     | 18 | -37.4 | 162 | cleavage stimulation factor, 3' pre-RNA, subunit 2, 64kDa                        | /                                             |
| miR-2861     | 21 | -39.7 | 143 | Ubiquinol-cytochrome-c reductase complex core protein 2, mitochondrial precursor | [EC:1.10.2.2]                                 |
| miR-720      | 19 | -36.6 | 132 | RNA-binding protein 4                                                            | /                                             |
| miR-1260     | 20 | -36.9 | 124 | Krt9                                                                             | ko:K07604 type I keratin, acidic              |
| miR-1400     | 19 | -35.7 | 121 | Krt9                                                                             | ko:K07604 type I keratin, acidic              |
| miR-4332     | 21 | -38.4 | 108 | Centrin-3                                                                        | /                                             |
| miR-1584     | 21 | -36.4 | 107 | Lysosomal protective protein precursor                                           | [EC 3.4.16.5]                                 |
| miR-769      | 20 | -35.6 | 105 | /                                                                                | /                                             |
| miR-1587     | 20 | -36.4 | 100 | IPP-2                                                                            | /                                             |
| miR-1934*    | 18 | -36.3 | 97  | hypothetical protein                                                             | /                                             |
| miR-504*     | 21 | -40.8 | 94  | putative CCDC28B protein 65.9                                                    | /                                             |
| miR-3058*    | 23 | -46   | 91  | hnRNP-K                                                                          | /                                             |
| miR-431      | 20 | -32.1 | 90  | /                                                                                | /                                             |
| miR-4300     | 19 | -34   | 88  | /                                                                                | /                                             |
| miR-669c*    | 25 | -38.4 | 86  | ribosomal protein S8                                                             | ko:K02993 small subunit ribosomal protein S7e |
| miR-242      | 22 | -37.2 | 82  | /                                                                                | /                                             |
| miR-347      | 19 | -39.4 | 78  | /                                                                                | /                                             |
| miR-194      | 22 | -32.7 | 72  | LSM1 homolog, U6 small nuclear RNA associated                                    | /                                             |
| miR-647      | 25 | -35.9 | 70  | Heterogeneous nuclear ribonucleoprotein K                                        | /                                             |
| miR-4020b-5p | 18 | -33.6 | 70  | Zinc finger protein 207                                                          | /                                             |
| miR-1254     | 21 | -34.1 | 70  | Ahcy                                                                             | [EC:3.3.1.1] ko:K01251 adenosylhomocysteinase |
| miR-669c     | 20 | -32.5 | 69  | /                                                                                | /                                             |

|             |    |       |    |                                                     |                                                                            |
|-------------|----|-------|----|-----------------------------------------------------|----------------------------------------------------------------------------|
| miR-574-5p  | 25 | -41.7 | 69 | hypothetical protein                                | /                                                                          |
| miR-4320    | 20 | -29.1 | 69 | /                                                   | /                                                                          |
| miR-1346    | 20 | -37.2 | 68 | hypothetical protein                                | /                                                                          |
| miR-92e-5p  | 20 | -36.2 | 67 | Zinc finger protein 207                             | /                                                                          |
| miR-423*    | 24 | -37.1 | 66 | hypothetical protein                                | /                                                                          |
| miR-1607    | 18 | -34.2 | 66 | Ibp2(Intersectin-EH-binding protein 2)              | /                                                                          |
| miR-4281    | 20 | -39.1 | 63 | /                                                   | /                                                                          |
| miR-671-5p  | 24 | -38.1 | 61 | Ras GTPase-activating protein-binding protein 1     | [EC:3.6.1.-]                                                               |
| miR-1307    | 23 | -36   | 61 | ADP-ribosylation factor 1 GTPase-activating protein | /                                                                          |
| miR-745*    | 23 | -36.8 | 59 | /                                                   | /                                                                          |
| miR-92d-5p  | 20 | -31.1 | 57 | hypothetical protein                                | /                                                                          |
| miR-1959    | 19 | -35.7 | 57 | /                                                   | /                                                                          |
| miR-4170-5p | 18 | -33.2 | 56 | putative 6-phosphogluconate dehydrogenase           | [EC:1.1.1.44]                                                              |
| miR-1612    | 24 | -36.6 | 56 | /                                                   | /                                                                          |
| miR-32*     | 24 | -30.8 | 55 | /                                                   | /                                                                          |
| miR-1345    | 18 | -32.5 | 55 | putative KH-type splicing regulatory protein        | /                                                                          |
| miR-485-5p  | 24 | -33.3 | 53 | Histone H2A                                         | /                                                                          |
| miR-78      | 21 | -31.9 | 51 | hypothetical protein                                | /                                                                          |
| miR-705     | 20 | -36.5 | 51 | CDC37                                               | ko:K09554 cell division cycle protein 37                                   |
| miR-4088-5p | 21 | -34   | 48 | /                                                   | /                                                                          |
| miR-125-2*  | 19 | -36   | 47 | Tubulin beta-2C chain                               | /                                                                          |
| miR-194a    | 21 | -32.3 | 46 | /                                                   | /                                                                          |
| miR-92b*    | 24 | -34.7 | 45 | lethal (2) 06225                                    | [EC:3.6.3.14] ko:K02140 F-type H <sup>+</sup> -transporting ATPase g chain |
| miR-3652    | 20 | -33.6 | 45 | hypothetical protein                                | /                                                                          |
| miR-277c*   | 21 | -30.9 | 45 | GTPase-activating protein ZNF289                    | /                                                                          |

|              |    |       |    |                                                              |                                                                                                    |
|--------------|----|-------|----|--------------------------------------------------------------|----------------------------------------------------------------------------------------------------|
| miR-277c     | 22 | -30.9 | 44 | Ribosomal protein S11                                        | ko:K02949 small subunit ribosomal protein S11e                                                     |
| miR-99b      | 22 | -31.8 | 43 | Ribosomal Protein, Large subunit                             | ko:K02894 large subunit ribosomal protein L23e                                                     |
| miR-27a*     | 22 | -34.6 | 42 | /                                                            | /                                                                                                  |
| miR-148a*    | 20 | -30.7 | 42 | Extracellular superoxide dismutase [Cu-Zn] precursor         | [EC:1.15.1.1]                                                                                      |
| miR-1231     | 18 | -32.7 | 42 | /                                                            | /                                                                                                  |
| let-7b       | 22 | -31.3 | 42 | hypothetical protein                                         | /                                                                                                  |
| miR-2386     | 22 | -30.1 | 41 | /                                                            | /                                                                                                  |
| miR-129-5p   | 21 | -33.6 | 41 | inositol polyphosphate-5-phosphatase E                       | [EC:3.1.3.36] ko:K01099<br>phosphatidylinositol-bisphosphatase                                     |
| miR-106b*    | 21 | -31.7 | 41 | Small nuclear ribonucleoprotein SM D3                        | /                                                                                                  |
| miR-980      | 21 | -33.2 | 40 | chloride intracellular channel 4                             | ko:K05024 chloride intracellular channel 4                                                         |
| miR-745b     | 22 | -33.2 | 40 | chloride intracellular channel 4                             | ko:K05024 chloride intracellular channel 4                                                         |
| miR-252      | 19 | -36.8 | 40 | Zinc finger protein 207                                      | /                                                                                                  |
| miR-1649*    | 18 | -35   | 40 | /                                                            | /                                                                                                  |
| miR-3666     | 25 | -35.3 | 39 | ATPase, H <sup>+</sup> transporting, lysosomal, V0 subunit c | [EC:3.6.3.14] ko:K02155 V-type<br>H <sup>+</sup> -transporting ATPase 16kDa proteolipid<br>subunit |
| miR-276a     | 24 | -31.4 | 39 | rpl-23                                                       | ko:K02894 large subunit ribosomal protein<br>L23e                                                  |
| miR-3622b-5p | 18 | -31.9 | 38 | /                                                            | /                                                                                                  |
| miR-1937a    | 19 | -35.2 | 38 | Heterogeneous nuclear ribonucleoprotein U-like protein<br>1  | /                                                                                                  |
| miR-423-5p   | 19 | -30.4 | 37 | putative transformer-2 protein                               | /                                                                                                  |
| miR-1759     | 25 | -37.4 | 36 | hypothetical protein                                         | /                                                                                                  |

|             |    |       |    |                                                                           |                                                    |
|-------------|----|-------|----|---------------------------------------------------------------------------|----------------------------------------------------|
| miR-1183    | 24 | -36.5 | 36 | RpL9                                                                      | ko:K02940 large subunit ribosomal protein L9e      |
| miR-23a*    | 22 | -31.4 | 35 | Splicing factor, arginine/serine-rich 7                                   | /                                                  |
| miR-10b     | 22 | -32.6 | 35 | Cellular retinaldehyde-binding protein                                    | /                                                  |
| miR-205*    | 22 | -32.9 | 34 | NAP-1-related protein                                                     | /                                                  |
| miR-10a-5p  | 24 | -34.7 | 34 | Cellular retinaldehyde-binding protein                                    | /                                                  |
| miR-10-5p   | 22 | -32.8 | 34 | hypothetical protein                                                      | /                                                  |
| miR-683     | 20 | -32.6 | 33 | Chromobox protein homolog 1                                               | /                                                  |
| miR-669g    | 23 | -32.1 | 33 | heat shock 10kD protein 1                                                 | /                                                  |
| miR-466i-5p | 20 | -29.9 | 33 | Basic helix-loop-helix dimerisation region bHLH,domain-containing protein | /                                                  |
| miR-2478    | 21 | -33.8 | 33 | cellular nucleic acid-binding protein                                     | /                                                  |
| miR-200b*   | 22 | -33.9 | 33 | putative choline phosphotransferase 1                                     | ko:K00994 diacylglycerol cholinephosphotransferase |
| miR-1816    | 21 | -32.2 | 32 | Pre-mRNA-splicing factor cwc15                                            | /                                                  |
| miR-1638    | 21 | -28.9 | 32 | ribosomal protein S14                                                     | ko:K02955 small subunit ribosomal protein S14e     |
| miR-339     | 22 | -34   | 30 | RAB family                                                                | ko:K07976 Rab family, other                        |
| miR-3180-3p | 24 | -39.1 | 30 | /                                                                         | /                                                  |
| miR-271     | 22 | -36.7 | 30 | Mastin precursor                                                          | [EC:3.4.21.-]                                      |
| miR-483-3p  | 18 | -30   | 29 | /                                                                         | /                                                  |
| miR-25      | 22 | -30.2 | 29 | hypothetical protein                                                      | /                                                  |
| miR-2411    | 20 | -32.6 | 29 | /                                                                         | /                                                  |
| miR-222b    | 21 | -32   | 29 | hypothetical protein                                                      | /                                                  |
| miR-193a-5p | 21 | -32.2 | 29 | hypothetical protein                                                      | /                                                  |
| miR-92a     | 22 | -30.7 | 28 | putative ATP synthase                                                     | [EC:3.6.3.14] ko:K02128 F-type                     |

|             |    |       |    |                                                                                                                     |                                                                             |
|-------------|----|-------|----|---------------------------------------------------------------------------------------------------------------------|-----------------------------------------------------------------------------|
|             |    |       |    |                                                                                                                     | H <sup>+</sup> -transporting ATPase subunit c                               |
| miR-2476    | 18 | -31.5 | 28 | hypothetical protein                                                                                                | /                                                                           |
| miR-277b    | 23 | -30.1 | 27 | CRISP-9                                                                                                             | /                                                                           |
| miR-2489    | 23 | -31.2 | 27 | polyubiquitin                                                                                                       | ko:K04551 ubiquitin B                                                       |
| miR-4148-5p | 20 | -33.6 | 26 | TATA box binding protein like 2                                                                                     | ko:K03120 transcription initiation factor<br>TFIID TATA-box-binding protein |
| miR-2b-3p   | 23 | -37.8 | 26 | Fh1                                                                                                                 | [EC:4.2.1.2] ko:K01679 fumarate hydratase                                   |
| miR-190a-5p | 30 | -32.8 | 26 | ribosomal protein S16                                                                                               | ko:K02960 small subunit ribosomal protein<br>S16e                           |
| miR-190     | 24 | -35.6 | 25 | /                                                                                                                   | /                                                                           |
| miR-149     | 22 | -32.9 | 25 | hypothetical protein                                                                                                | /                                                                           |
| miR-652     | 21 | -34.5 | 24 | may be involved in transcription elongation by<br>mediating interactions between RNA polymerase II and<br>chromatin | /                                                                           |
| miR-29a     | 22 | -33.6 | 24 | large subunit ribosomal protein L10e                                                                                | /                                                                           |
| miR-2387    | 25 | -37.3 | 24 | /                                                                                                                   | /                                                                           |
| miR-739     | 20 | -36.4 | 23 | hypothetical protein                                                                                                | ko:K04645 clathrin, light polypeptide B                                     |
| miR-604     | 18 | -32   | 23 | KH domain-containing, RNA-binding, signal<br>transduction-associated protein 1                                      | /                                                                           |
| miR-3126-5p | 24 | -34.6 | 23 | U3 small nucleolar RNA-interacting protein 2                                                                        | /                                                                           |
| miR-277     | 22 | -28.7 | 23 | putative U5 snRNP-specific protein                                                                                  | /                                                                           |
| miR-466i-3p | 24 | -46.6 | 22 | hypothetical protein                                                                                                | /                                                                           |
| miR-3488    | 20 | -33.4 | 22 | hypothetical protein                                                                                                | /                                                                           |
| miR-1556    | 25 | -35   | 22 | hypothetical protein                                                                                                | /                                                                           |
| miR-1386    | 21 | -42.9 | 22 | /                                                                                                                   | /                                                                           |
| miR-8-3p    | 22 | -28.5 | 21 | small subunit ribosomal protein S30e                                                                                | /                                                                           |

|             |    |       |    |                                                                          |                                                |
|-------------|----|-------|----|--------------------------------------------------------------------------|------------------------------------------------|
| miR-3095-3p | 24 | -36.4 | 21 | /                                                                        | /                                              |
| miR-24      | 22 | -33.5 | 21 | High mobility group protein 20A                                          | /                                              |
| miR-184b    | 20 | -34.1 | 21 | /                                                                        | /                                              |
| miR-1786    | 21 | -32.9 | 21 | Import inner membrane translocase subunit TIM44, mitochondrial precursor | /                                              |
| miR-147     | 21 | -32.8 | 21 | Cathepsin B-like cysteine proteinase precursor                           | [EC:3.4.22.-]                                  |
| miR-99a     | 21 | -32.3 | 20 | /                                                                        | /                                              |
| miR-3176    | 19 | -31.9 | 20 | /                                                                        | /                                              |
| miR-3118    | 24 | -34   | 20 | putative 40S ribosomal protein S9                                        | ko:K02997 small subunit ribosomal protein S9e  |
| miR-2397    | 20 | -34.4 | 20 | PSMC3                                                                    | ko:K03065 26S proteasome regulatory subunit T5 |
| miR-1274b   | 20 | -37.4 | 19 | /                                                                        | /                                              |
| miR-3482-3p | 23 | -44.6 | 18 | hypothetical protein                                                     | /                                              |
| miR-320a    | 22 | -34.3 | 18 | Acidic leucine-rich nuclear phosphoprotein 32-related protein            | /                                              |
| miR-236     | 24 | -31.7 | 18 | signal peptidase complex subunit 2 homolog                               | /                                              |
| miR-2230*   | 23 | -34.5 | 18 | Peptidase M8, leishmanolysin                                             | /                                              |
| miR-2200*   | 21 | -32.7 | 18 | hypothetical protein                                                     | /                                              |
| miR-1603    | 18 | -31.9 | 18 | /                                                                        | /                                              |
| miR-765     | 21 | -33.6 | 17 | /                                                                        | /                                              |
| miR-749     | 25 | -40.4 | 17 | Basic-leucine zipper (bZIP) transcription factor                         | /                                              |
| miR-677     | 21 | -36.7 | 17 | High mobility group protein DSP1                                         | /                                              |
| miR-423-3p  | 23 | -37.6 | 17 | /                                                                        | /                                              |
| miR-3483-5p | 22 | -40.1 | 17 | hypothetical protein                                                     | /                                              |
| miR-339b    | 20 | -33.9 | 17 | Centaurin-alpha 1 (Putative MAPK-activating protein                      | /                                              |

|             |    |       |    |                                                                                  |                                                         |
|-------------|----|-------|----|----------------------------------------------------------------------------------|---------------------------------------------------------|
|             |    |       |    | PM25)                                                                            |                                                         |
| miR-2440    | 19 | -31.8 | 17 | /                                                                                | /                                                       |
| miR-150*    | 20 | -34   | 17 | Ubiquinol-cytochrome-c reductase complex core protein 2, mitochondrial precursor | [EC:1.10.2.2]                                           |
| miR-767-3p  | 24 | -33.4 | 16 | Splicing factor, arginine/serine-rich 7                                          | /                                                       |
| miR-2993    | 20 | -33.7 | 16 | /                                                                                | /                                                       |
| miR-28-3p   | 22 | -34.7 | 16 | Heterogeneous nuclear ribonucleoprotein K                                        | /                                                       |
| miR-2785    | 21 | -31.5 | 16 | /                                                                                | /                                                       |
| miR-181a-2* | 24 | -37.5 | 16 | /                                                                                | /                                                       |
| miR-1614*   | 19 | -31.7 | 16 | /                                                                                | /                                                       |
| miR-1       | 21 | -33   | 16 | /                                                                                | /                                                       |
| miR-87b     | 22 | -30.9 | 15 | putative ribosomal protein L31                                                   | ko:K02910 large subunit ribosomal protein L31e          |
| miR-87      | 22 | -29   | 15 | putative ribosomal protein L31                                                   | ko:K02910 large subunit ribosomal protein L31e          |
| miR-500a*   | 23 | -33.8 | 15 | ARMET-like protein precursor                                                     | /                                                       |
| miR-4131-3p | 20 | -33.5 | 15 | hypothetical protein                                                             | /                                                       |
| miR-4106-3p | 21 | -26.1 | 15 | hypothetical protein                                                             | /                                                       |
| miR-3492    | 24 | -32.8 | 15 | /                                                                                | /                                                       |
| miR-2065    | 19 | -30   | 15 | glutathione S-transferase M1                                                     | [EC:2.5.1.18] ko:K00799 glutathione S-transferase       |
| miR-2020    | 25 | -34.9 | 15 | /                                                                                | /                                                       |
| miR-1794    | 24 | -31.8 | 15 | /                                                                                | /                                                       |
| miR-84      | 23 | -32.1 | 14 | ubiquitin conjugating enzyme 3b                                                  | [EC:6.3.2.19] ko:K02207 ubiquitin-conjugating enzyme E2 |
| miR-745     | 22 | -33.2 | 14 | /                                                                                | /                                                       |

|             |    |       |    |                                                                    |                                                                              |
|-------------|----|-------|----|--------------------------------------------------------------------|------------------------------------------------------------------------------|
| miR-341     | 19 | -34.2 | 14 | /                                                                  | /                                                                            |
| miR-2537*   | 20 | -35.5 | 14 | cytosolic malate dehydrogenase                                     | [EC:1.1.1.37] ko:K00026 malate dehydrogenase                                 |
| miR-1701    | 20 | -31.7 | 14 | /                                                                  | /                                                                            |
| miR-153*    | 20 | -33   | 14 | hypothetical protein                                               | /                                                                            |
| miR-133     | 23 | -33.8 | 14 | Heterogeneous nuclear ribonucleoprotein K                          | /                                                                            |
| miR-92b     | 22 | -34.7 | 13 | THO complex subunit 4                                              | /                                                                            |
| miR-532-3p  | 22 | -35.9 | 13 | signal transduction-associated protein 1                           | /                                                                            |
| miR-463     | 20 | -30.5 | 13 | Splicing factor, arginine/serine-rich 7                            | /                                                                            |
| miR-4115-5p | 22 | -31   | 13 | ATPase, H <sup>+</sup> transporting, lysosomal 31kDa, V1 subunit E | [EC:3.6.3.14] ko:K02150 V-type H <sup>+</sup> -transporting ATPase subunit E |
| miR-3475    | 21 | -30.3 | 13 | putative ubiquitin-conjugating enzyme                              | /                                                                            |
| miR-320c    | 19 | -31.1 | 13 | Egg protein CP111                                                  | /                                                                            |
| miR-2450b   | 24 | -32.1 | 13 | GrpE-like protein                                                  | ko:K03687 molecular chaperone GrpE                                           |
| miR-1837    | 25 | -35.4 | 13 | NADH dehydrogenase (ubiquinone) 1 beta subcomplex 9                | [EC:1.6.5.3 1.6.99.3]                                                        |
| miR-1639    | 18 | -31.3 | 13 | /                                                                  | /                                                                            |
| miR-146b-3p | 23 | -33.9 | 13 | Voltage-dependent anion-selective channel protein 2                | /                                                                            |
| miR-106b    | 21 | -33.3 | 13 | cyclin B1 interacting protein 1                                    | [EC:6.3.2.-]                                                                 |
| miR-1010*   | 21 | -30.4 | 13 | Dynein light chain 2, cytoplasmic                                  | /                                                                            |
| miR-7c      | 22 | -30.9 | 12 | /                                                                  | /                                                                            |
| miR-4255    | 20 | -33   | 12 | /                                                                  | /                                                                            |
| miR-4139-3p | 22 | -31.1 | 12 | TAR DNA-binding protein 43                                         | /                                                                            |
| miR-375-3p  | 20 | -32.6 | 12 | Brix domain-containing protein 1                                   | /                                                                            |
| miR-3500    | 19 | -32.3 | 12 | hypothetical protein                                               | /                                                                            |
| miR-253     | 21 | -32.2 | 12 | conserved hypothetical protein                                     | /                                                                            |

|             |    |       |    |                                                                   |                                                                              |
|-------------|----|-------|----|-------------------------------------------------------------------|------------------------------------------------------------------------------|
| miR-1939    | 22 | -33.2 | 12 | /                                                                 | /                                                                            |
| miR-107     | 23 | -38.8 | 12 | putative Vesicle-associated membrane protein-associated protein A | /                                                                            |
| miR-103     | 23 | -36.5 | 12 | putative Vesicle-associated membrane protein-associated protein A | /                                                                            |
| miR-669e    | 21 | -31.4 | 11 | hypothetical protein                                              | /                                                                            |
| miR-520d-5p | 18 | -31.7 | 11 | putative ATP-dependent RNA helicase DDX17                         | [EC:3.6.1.-]                                                                 |
| miR-4035-3p | 21 | -33.7 | 11 | hypothetical protein                                              | /                                                                            |
| miR-3923    | 25 | -33.7 | 11 | /                                                                 | /                                                                            |
| miR-361-5p  | 22 | -32.7 | 11 | /                                                                 | /                                                                            |
| miR-3432    | 24 | -34.1 | 11 | /                                                                 | /                                                                            |
| miR-320     | 21 | -28.9 | 11 | putative ATP synthase                                             | [EC:3.6.3.14] ko:K02128 F-type H <sup>+</sup> -transporting ATPase subunit c |
| miR-31b     | 23 | -34.3 | 11 | /                                                                 | /                                                                            |
| miR-3021    | 24 | -35.1 | 11 | Flot1                                                             | ko:K07192 flotillin                                                          |
| miR-295     | 23 | -29.1 | 11 | /                                                                 | /                                                                            |
| miR-2834    | 20 | -33.4 | 11 | calreticulin                                                      | ko:K08057 calreticulin                                                       |
| miR-193b*   | 21 | -34.5 | 11 | /                                                                 | /                                                                            |
| miR-181b    | 21 | -35   | 11 | /                                                                 | /                                                                            |
| miR-1269    | 26 | -34.8 | 11 | /                                                                 | /                                                                            |
| miR-124-5p  | 22 | -32.2 | 11 | /                                                                 | /                                                                            |
| miR-105     | 24 | -28.7 | 11 | small subunit ribosomal protein S27e                              | /                                                                            |
| miR-541     | 20 | -33.6 | 10 | NECAP-like protein CG9132                                         | /                                                                            |
| miR-518d-5p | 23 | -31   | 10 | /                                                                 | /                                                                            |
| miR-466f-3p | 21 | -33.1 | 10 | /                                                                 | /                                                                            |
| miR-4294    | 20 | -34.6 | 10 | /                                                                 | /                                                                            |

|             |    |       |    |                                                         |                                                                                           |
|-------------|----|-------|----|---------------------------------------------------------|-------------------------------------------------------------------------------------------|
| miR-34      | 20 | -28.4 | 10 | Huntingtin-interacting protein HYPK                     | /                                                                                         |
| miR-3229    | 22 | -30   | 10 | Nuclear ribonuclease Z                                  | [EC:3.1.26.11]                                                                            |
| miR-1642    | 26 | -35.3 | 10 | Glioma pathogenesis-related protein 1 precursor         | /                                                                                         |
| miR-151-3p  | 22 | -35.7 | 10 | /                                                       | /                                                                                         |
| miR-1290    | 20 | -31.3 | 10 | /                                                       | /                                                                                         |
| bantam      | 22 | -27.4 | 10 | hypothetical protein                                    | /                                                                                         |
| miR-486-3p  | 19 | -29.1 | 9  | hypothetical protein                                    | /                                                                                         |
| miR-449d    | 18 | -30.5 | 9  | hypothetical protein                                    | /                                                                                         |
| miR-3479-5p | 23 | -29.6 | 9  | hypothetical protein                                    | /                                                                                         |
| miR-30e     | 23 | -32.8 | 9  | /                                                       | /                                                                                         |
| miR-2941-1* | 20 | -34.2 | 9  | succinate dehydrogenase complex, subunit B, iron sulfur | [EC:1.3.5.1] ko:K00235 succinate dehydrogenase (ubiquinone) iron-sulfur protein precursor |
| miR-1616    | 21 | -34.1 | 9  | hypothetical protein                                    | /                                                                                         |
| miR-148b-3p | 22 | -28.9 | 9  | /                                                       | /                                                                                         |
| miR-138     | 18 | -30.8 | 9  | Histone H2B                                             | /                                                                                         |
| miR-96a     | 23 | -32.8 | 8  | /                                                       | /                                                                                         |
| miR-960     | 22 | -29.2 | 8  | /                                                       | /                                                                                         |
| miR-555     | 19 | -31.3 | 8  | Ras-related protein Rab-4A                              | /                                                                                         |
| miR-3505    | 25 | -35.6 | 8  | glyoxalase I                                            | [EC:4.4.1.5] ko:K01759 lactoylglutathione lyase                                           |
| miR-320e    | 19 | -28.9 | 8  | putative Brain protein 44-like                          | /                                                                                         |
| miR-31      | 22 | -33.2 | 8  | Peroxiredoxin 5037                                      | [EC:1.11.1.15] ko:K03386 peroxiredoxin (alkyl hydroperoxide reductase subunit C)          |
| miR-30e-5p  | 24 | -32.8 | 8  | /                                                       | /                                                                                         |
| miR-278     | 21 | -34.6 | 8  | /                                                       | /                                                                                         |

|             |    |       |   |                                                                                                |                                                                                           |
|-------------|----|-------|---|------------------------------------------------------------------------------------------------|-------------------------------------------------------------------------------------------|
| miR-203     | 21 | -30.8 | 8 | Dfh                                                                                            | /                                                                                         |
| miR-1992-3p | 18 | -32.4 | 8 | Rhabdoid tumor deletion region protein 1                                                       | /                                                                                         |
| miR-100     | 21 | -27.4 | 8 | hypothetical protein                                                                           | /                                                                                         |
| miR-71a     | 25 | -35   | 7 | growth factor receptor bound protein 2                                                         | ko:K04364 growth factor receptor-binding protein 2                                        |
| miR-532-5p  | 22 | -33.2 | 7 | DnaJ (Hsp40) homolog, subfamily A, member 1                                                    | ko:K09502 DnaJ homolog, subfamily A, member 1                                             |
| miR-429     | 22 | -31.9 | 7 | putative Proline synthetase co-transcribed bacterial homolog protein                           | /                                                                                         |
| miR-4115-3p | 19 | -30.9 | 7 | Sdhh                                                                                           | [EC:1.3.5.1] ko:K00235 succinate dehydrogenase (ubiquinone) iron-sulfur protein precursor |
| miR-4038-3p | 19 | -27.9 | 7 | ATPase, F0 complex, subunit E, mitochondrial, domain-containing protein                        | /                                                                                         |
| miR-375     | 22 | -34.4 | 7 | Brix domain-containing protein 1                                                               | /                                                                                         |
| miR-36-3p   | 23 | -35.1 | 7 | Immunogenic miracidial antigen 8I'                                                             | /                                                                                         |
| miR-330-3p  | 21 | -37.9 | 7 | putative dihydrolipoamide S-acetyltransferase (E2 component of pyruvate dehydrogenase complex) | ko:K00627 pyruvate dehydrogenase E2 component                                             |
| miR-2d-5p   | 21 | -34.6 | 7 | /                                                                                              | /                                                                                         |
| miR-277d-3p | 24 | -28.5 | 7 | rps-21                                                                                         | ko:K02971 small subunit ribosomal protein S21e                                            |
| miR-2549    | 18 | -35.2 | 7 | Heterogeneous nuclear ribonucleoprotein A2 homolog 1                                           | /                                                                                         |
| miR-2231    | 18 | -30.9 | 7 | /                                                                                              | /                                                                                         |
| miR-2205    | 22 | -34.2 | 7 | /                                                                                              | /                                                                                         |
| miR-196d    | 22 | -30.8 | 7 | /                                                                                              | /                                                                                         |
| miR-1942    | 20 | -31.7 | 7 | Growth factor receptor-bound protein 2                                                         | /                                                                                         |

|             |    |       |   |                                                      |                                                                                            |
|-------------|----|-------|---|------------------------------------------------------|--------------------------------------------------------------------------------------------|
| miR-1274a   | 22 | -34.3 | 7 | /                                                    | /                                                                                          |
| miR-125b*   | 21 | -33.2 | 7 | NADH dehydrogenase (ubiquinone) 1 alpha subcomplex 8 | [EC:1.6.5.3 1.6.99.3]                                                                      |
| miR-124-3p  | 21 | -33.5 | 7 | rps-26                                               | ko:K02976 small subunit ribosomal protein S26e                                             |
| miR-598     | 20 | -30   | 6 | Splicing factor, arginine/serine-rich 7              | /                                                                                          |
| miR-509a    | 24 | -30.8 | 6 | isoamyl acetate-hydrolyzing esterase 1 homolog       | /                                                                                          |
| miR-506     | 19 | -29.1 | 6 | succinate dehydrogenase complex                      | [EC:1.3.5.1] ko:K00236 succinate dehydrogenase (ubiquinone) cytochrome b subunit precursor |
| miR-466b-1* | 22 | -31.6 | 6 | hypothetical protein                                 | /                                                                                          |
| miR-4150-5p | 19 | -35.7 | 6 | Zinc finger protein                                  | /                                                                                          |
| miR-4101-3p | 19 | -28.5 | 6 | Zinc finger CDGSH domain-containing protein 1        | /                                                                                          |
| miR-377*    | 24 | -32.8 | 6 | Aquaporin-9 (AQP-9) (Small solute channel 1)         | /                                                                                          |
| miR-302b    | 18 | -31.5 | 6 | hypothetical protein                                 | /                                                                                          |
| miR-2c-5p   | 22 | -30.6 | 6 | /                                                    | /                                                                                          |
| miR-288     | 22 | -30.8 | 6 | hypothetical protein                                 | /                                                                                          |
| miR-2269    | 19 | -29.4 | 6 | /                                                    | /                                                                                          |
| miR-196a    | 22 | -32.9 | 6 | /                                                    | /                                                                                          |
| miR-1967    | 24 | -33.8 | 6 | U3 small nucleolar RNA-interacting protein 2         | /                                                                                          |
| miR-196     | 21 | -31.6 | 6 | /                                                    | /                                                                                          |
| miR-184     | 22 | -32   | 6 | /                                                    | /                                                                                          |
| miR-1480    | 24 | -40.2 | 6 | GPI-anchored membrane protein 1                      | /                                                                                          |
| let-7       | 21 | -32.9 | 6 | DNMAP1                                               | /                                                                                          |
| miR-509-3p  | 21 | -32.9 | 5 | LIM/homeobox protein Lhx5                            | /                                                                                          |
| miR-483     | 20 | -31.5 | 5 | NAP-1-related protein                                | /                                                                                          |

|             |    |       |   |                                                |                                                                                |
|-------------|----|-------|---|------------------------------------------------|--------------------------------------------------------------------------------|
| miR-4289    | 19 | -29.8 | 5 | /                                              | /                                                                              |
| miR-4144-3p | 18 | -30.2 | 5 | NADH dehydrogenase (ubiquinone) Fe-S protein 8 | [EC:1.6.5.3 1.6.99.3] ko:K03941 NADH dehydrogenase (ubiquinone) Fe-S protein 8 |
| miR-3692*   | 23 | -35.2 | 5 | hypothetical protein                           | /                                                                              |
| miR-3535    | 26 | -41.2 | 5 | ATP-dependent rRNA helicase RRP3               | [EC:3.6.1.-]                                                                   |
| miR-330     | 20 | -31.3 | 5 | hypothetical protein                           | ko:K07567 TdcF protein                                                         |
| miR-31b-1*  | 21 | -31.8 | 5 | putative UDP-galactose-4-epimerase             | ko:K01784 UDP-glucose 4-epimerase                                              |
| miR-2997    | 21 | -29.7 | 5 | prefoldin subunit 4                            | ko:K09550 prefoldin subunit 4                                                  |
| miR-2955    | 21 | -34.2 | 5 | /                                              | /                                                                              |
| miR-281     | 22 | -30.1 | 5 | /                                              | /                                                                              |
| miR-2772a   | 19 | -30.5 | 5 | /                                              | /                                                                              |
| miR-2448    | 24 | -36.3 | 5 | /                                              | /                                                                              |
| miR-23b     | 23 | -31.6 | 5 | /                                              | /                                                                              |
| miR-224     | 20 | -33.7 | 5 | putative alpha-1,3-mannosyltransferase         | /                                                                              |
| miR-2136    | 20 | -32.1 | 5 | SNAP-alpha                                     | /                                                                              |
| miR-205     | 23 | -33.9 | 5 | /                                              | /                                                                              |
| miR-2032a   | 18 | -30.4 | 5 | /                                              | /                                                                              |
| miR-1682    | 20 | -34.4 | 5 | SAPK substrate protein 1                       | /                                                                              |
| miR-16      | 22 | -31   | 5 | /                                              | /                                                                              |
| miR-1381    | 19 | -30.4 | 5 | /                                              | /                                                                              |
| miR-1376    | 19 | -32.2 | 5 | hypothetical protein                           | /                                                                              |
| miR-1247*   | 18 | -34.8 | 5 | /                                              | /                                                                              |
| miR-107b    | 24 | -32   | 5 | hypothetical protein                           | /                                                                              |
| miR-106a    | 22 | -32.7 | 5 | /                                              | /                                                                              |
| miR-76      | 22 | -29.1 | 4 | /                                              | /                                                                              |
| miR-75*     | 20 | -39.6 | 4 | /                                              | /                                                                              |

|             |    |       |   |                                                            |                                                                 |
|-------------|----|-------|---|------------------------------------------------------------|-----------------------------------------------------------------|
| miR-632     | 19 | -32.1 | 4 | Phosducin-like protein 3                                   | /                                                               |
| miR-486-5p  | 21 | -31.8 | 4 | Heat shock protein 60                                      | ko:K04077 chaperonin GroEL                                      |
| miR-4130-3p | 20 | -29.4 | 4 | /                                                          | /                                                               |
| miR-4121-3p | 19 | -31.9 | 4 | hypothetical protein                                       | /                                                               |
| miR-4052-3p | 21 | -33.8 | 4 | /                                                          | /                                                               |
| miR-378b    | 21 | -34.2 | 4 | VTI1A                                                      | ko:K08493 vesicle transport through interaction with t-SNAREs 1 |
| miR-36a*    | 20 | -30.2 | 4 | isocitrate dehydrogenase (NAD+)                            | [EC:1.1.1.41]                                                   |
| miR-30d*    | 24 | -31.6 | 4 | Histidine-rich glycoprotein precursor                      | /                                                               |
| miR-302c    | 22 | -32   | 4 | /                                                          | /                                                               |
| miR-2779    | 22 | -32.1 | 4 | hypothetical protein                                       | /                                                               |
| miR-272     | 20 | -26.2 | 4 | /                                                          | /                                                               |
| miR-2261    | 20 | -28.2 | 4 | /                                                          | /                                                               |
| miR-221     | 23 | -29.2 | 4 | hypothetical protein                                       | /                                                               |
| miR-214     | 18 | -31.6 | 4 | Transmembrane emp24 domain-containing protein 10 precursor | /                                                               |
| miR-210     | 18 | -30.1 | 4 | /                                                          | /                                                               |
| miR-17-5p   | 26 | -34.3 | 4 | Transmembrane protein 112                                  | /                                                               |
| miR-16b     | 22 | -31.9 | 4 | /                                                          | /                                                               |
| miR-1541    | 19 | -31.8 | 4 | coenzyme Q2 homolog, prenyltransferase                     | [EC:2.5.1.-] ko:K06125 4-hydroxybenzoate hexaprenyltransferase  |
| miR-142-3p  | 21 | -30.5 | 4 | /                                                          | /                                                               |
| miR-139     | 19 | -32.6 | 4 | eIF-4E protein                                             | ko:K03259 translation initiation factor eIF-4E                  |
| miR-1371    | 19 | -31.1 | 4 | Shwachman-Bodian-Diamond syndrome protein homolog          | /                                                               |

|              |    |       |   |                                                                               |                                                         |
|--------------|----|-------|---|-------------------------------------------------------------------------------|---------------------------------------------------------|
| miR-1190     | 24 | -35.6 | 4 | Sorcin                                                                        | /                                                       |
| miR-1019*    | 23 | -29.3 | 4 | Dynein light chain Tctex-type 1 (T-complex testis-specific protein 1 homolog) | /                                                       |
| miR-998      | 19 | -32.9 | 3 | /                                                                             | /                                                       |
| miR-678      | 20 | -30.6 | 3 | /                                                                             | /                                                       |
| miR-503      | 19 | -31.4 | 3 | V-type H <sup>+</sup> -transporting ATPase subunit F                          | [EC:3.6.3.14]                                           |
| miR-466b-2*  | 21 | -31.8 | 3 | ribosomal protein S8                                                          | ko:K02993 small subunit ribosomal protein S7e           |
| miR-4206-3p  | 19 | -31.4 | 3 | hypothetical protein                                                          | /                                                       |
| miR-4194-3p  | 20 | -30.8 | 3 | /                                                                             | /                                                       |
| miR-4175-3p  | 19 | -32.3 | 3 | U1 small nuclear ribonucleoprotein A                                          | /                                                       |
| miR-4104-5p  | 20 | -32.1 | 3 | /                                                                             | /                                                       |
| miR-4088-3p  | 18 | -26.5 | 3 | /                                                                             | /                                                       |
| miR-4001b-5p | 21 | -29.6 | 3 | Ribosomal protein L37a                                                        | ko:K02922 large subunit ribosomal protein L37e          |
| miR-3934     | 20 | -31.8 | 3 | Translocation-associated membrane protein 1                                   | /                                                       |
| miR-383      | 19 | -32   | 3 | /                                                                             | /                                                       |
| miR-382      | 22 | -32.7 | 3 | /                                                                             | /                                                       |
| miR-378c     | 22 | -36.9 | 3 | protein KINase                                                                | [EC:2.7.11.1] ko:K02218 casein kinase 1                 |
| miR-378      | 22 | -35.2 | 3 | kin-19                                                                        | [EC:2.7.11.1] ko:K02218 casein kinase 1                 |
| miR-36c      | 18 | -30.7 | 3 | heat shock protein 90kDa alpha                                                | ko:K04079 molecular chaperone HtpG                      |
| miR-369-3p   | 20 | -29.6 | 3 | eukaryotic translation initiation factor 3, subunit 3 gamma                   | ko:K03247 translation initiation factor eIF-3 subunit 3 |
| miR-3681     | 19 | -32.5 | 3 | carboxypeptidase N, polypeptide 1, 50kD                                       | /                                                       |
| miR-3592     | 24 | -35   | 3 | Tubulin beta-2C chain                                                         | /                                                       |
| miR-3559-3p  | 20 | -29.6 | 3 | ATPase                                                                        | /                                                       |

|             |    |       |   |                                                           |                                           |
|-------------|----|-------|---|-----------------------------------------------------------|-------------------------------------------|
| miR-3499    | 23 | -30.6 | 3 | /                                                         | /                                         |
| miR-3497    | 19 | -32   | 3 | Cleavage and polyadenylation specificity factor subunit 4 | /                                         |
| miR-331*    | 18 | -30.4 | 3 | Centaurin-alpha 1 (Putative MAPK-activating protein PM25) | /                                         |
| miR-27a     | 21 | -31.3 | 3 | /                                                         | /                                         |
| miR-2789    | 21 | -31.6 | 3 | /                                                         | /                                         |
| miR-2772b   | 19 | -28.2 | 3 | /                                                         | /                                         |
| miR-2764    | 24 | -33.7 | 3 | /                                                         | /                                         |
| miR-2463    | 20 | -31.4 | 3 | /                                                         | /                                         |
| miR-219-5p  | 23 | -28.9 | 3 | hypothetical protein                                      | /                                         |
| miR-1957    | 20 | -26.3 | 3 | /                                                         | /                                         |
| miR-190-5p  | 23 | -33   | 3 | /                                                         | /                                         |
| miR-18a     | 24 | -34.7 | 3 | CTD small phosphatase-like protein                        | /                                         |
| miR-181c    | 23 | -33.9 | 3 | hypothetical protein                                      | /                                         |
| miR-181a    | 23 | -34.2 | 3 | /                                                         | /                                         |
| miR-1742    | 20 | -31.9 | 3 | Intersectin-1 (SH3 domain-containing protein 1A)          | /                                         |
| miR-1733    | 23 | -32.4 | 3 | /                                                         | /                                         |
| miR-1725    | 22 | -27.6 | 3 | /                                                         | /                                         |
| miR-151-5p  | 21 | -29.9 | 3 | hypothetical protein                                      | /                                         |
| miR-150     | 23 | -33.1 | 3 | /                                                         | /                                         |
| miR-148a    | 22 | -28.9 | 3 | /                                                         | /                                         |
| miR-1421ah* | 21 | -27.7 | 3 | /                                                         | /                                         |
| miR-133c    | 21 | -30.2 | 3 | /                                                         | /                                         |
| miR-1293    | 22 | -28.9 | 3 | /                                                         | /                                         |
| miR-124a    | 19 | -30.5 | 3 | rps-26                                                    | ko:K02976 small subunit ribosomal protein |

---

|              |    |       |   |                                                                       |  |                                                                   |
|--------------|----|-------|---|-----------------------------------------------------------------------|--|-------------------------------------------------------------------|
|              |    |       |   |                                                                       |  | S26e                                                              |
| miR-124      | 19 | -28   | 3 | /                                                                     |  | /                                                                 |
| miR-9c       | 20 | -29.7 | 2 | /                                                                     |  | /                                                                 |
| miR-96       | 20 | -28.8 | 2 | /                                                                     |  | /                                                                 |
| miR-93       | 23 | -29.9 | 2 | ribosomal protein, large P2                                           |  | ko:K02943 large subunit ribosomal protein LP2                     |
| miR-733      | 20 | -29.3 | 2 | /                                                                     |  | /                                                                 |
| miR-654-5p   | 19 | -30.9 | 2 | /                                                                     |  | /                                                                 |
| miR-61       | 23 | -33.4 | 2 | ITPKB                                                                 |  | [EC:2.7.1.127] ko:K00911<br>1D-myo-inositol-triphosphate 3-kinase |
| miR-4162-5p  | 26 | -31.6 | 2 | ribosomal protein, large P2                                           |  | ko:K02943 large subunit ribosomal protein LP2                     |
| miR-4156-3p  | 22 | -28.1 | 2 | /                                                                     |  | /                                                                 |
| miR-4154-3p  | 19 | -30.4 | 2 | Mitochondrial 28S ribosomal protein S29                               |  | /                                                                 |
| miR-4082-3p  | 18 | -30.5 | 2 | transcription initiation factor TFIIH subunit H1                      |  | /                                                                 |
| miR-4080-3p  | 21 | -29.4 | 2 | CDK-activating kinase assembly factor MAT1 (RING finger protein MAT1) |  | /                                                                 |
| miR-4077a-5p | 22 | -31.6 | 2 | /                                                                     |  | /                                                                 |
| miR-4055-5p  | 20 | -28.7 | 2 | Proteinase inhibitor I2, Kunitz metazoa, domain-containing protein    |  | /                                                                 |
| miR-4044-5p  | 19 | -27.6 | 2 | /                                                                     |  | /                                                                 |
| miR-4004-5p  | 19 | -31.1 | 2 | Transmembrane 9 superfamily protein member 4                          |  | /                                                                 |
| miR-3915     | 21 | -30.2 | 2 | Sjogren syndrome/scleroderma autoantigen 1 homolog                    |  | /                                                                 |
| miR-3650     | 19 | -36.7 | 2 | Homeobox protein ceh-18                                               |  | /                                                                 |
| miR-3271     | 23 | -29.6 | 2 | Guanine nucleotide-binding protein subunit beta 2-like 1              |  | /                                                                 |

---

|            |    |       |   |                                                          |                                                                   |
|------------|----|-------|---|----------------------------------------------------------|-------------------------------------------------------------------|
| miR-3203   | 22 | -32.6 | 2 | /                                                        | /                                                                 |
| miR-3149   | 21 | -27.9 | 2 | hypothetical protein                                     | /                                                                 |
| miR-30a-5p | 24 | -31.4 | 2 | /                                                        | /                                                                 |
| miR-2f     | 19 | -26.3 | 2 | H/ACA ribonucleoprotein complex subunit 3                | /                                                                 |
| miR-2d-3p  | 24 | -32.2 | 2 | Uev1A                                                    | /                                                                 |
| miR-2d-3p  | 24 | -32.2 | 2 | putative ubiquitin-conjugating enzyme                    | /                                                                 |
| miR-2c-3p  | 29 | -36.8 | 2 | Sperm-associated antigen 6                               | /                                                                 |
| miR-2840   | 20 | -33.9 | 2 | U1 small nuclear ribonucleoprotein C                     | /                                                                 |
| miR-2807c* | 22 | -28.8 | 2 | Major egg antigen (p40)                                  | /                                                                 |
| miR-24b    | 21 | -32.6 | 2 | /                                                        | /                                                                 |
| miR-2178   | 20 | -31   | 2 | /                                                        | /                                                                 |
| miR-21     | 23 | -31.2 | 2 | /                                                        | /                                                                 |
| miR-2014   | 25 | -37.1 | 2 | /                                                        | /                                                                 |
| miR-200a*  | 22 | -29.8 | 2 | /                                                        | /                                                                 |
| miR-1948*  | 21 | -28.5 | 2 | U6 snRNA-associated Sm-like protein LSM5                 | /                                                                 |
| miR-191    | 23 | -32   | 2 | Tctex1 domain containing-protein 1                       | /                                                                 |
| miR-145*   | 23 | -31.2 | 2 | mitochondrial ribosomal protein L43                      | /                                                                 |
| miR-144*   | 23 | -31.9 | 2 | Serine/threonine-protein phosphatase 4 catalytic subunit | [EC:3.1.3.16]                                                     |
| miR-143    | 20 | -28   | 2 | /                                                        | /                                                                 |
| miR-1421ac | 25 | -35.4 | 2 | Calcium-binding EF-hand, domain-containing protein       | /                                                                 |
| miR-141    | 23 | -30.2 | 2 | /                                                        | /                                                                 |
| miR-140*   | 19 | -27.1 | 2 | hypothetical protein                                     | /                                                                 |
| miR-135b   | 23 | -32.2 | 2 | hypothetical protein                                     | /                                                                 |
| miR-128    | 22 | -29.7 | 2 | Suppressor of profilin 2                                 | ko:K05757 actin related protein 2/3 complex, subunit 1A/1B, 41kDa |
| miR-1253   | 19 | -29.7 | 2 | hypothetical protein                                     | /                                                                 |

|             |    |       |   |                                                |                                         |
|-------------|----|-------|---|------------------------------------------------|-----------------------------------------|
| miR-122b    | 25 | -34.2 | 2 | Universal stress protein                       | /                                       |
| miR-122     | 24 | -30.7 | 2 | /                                              | /                                       |
| miR-98      | 23 | -31.4 | 1 | hypothetical protein                           | /                                       |
| miR-891a    | 20 | -32   | 1 | kin-19                                         | [EC:2.7.11.1] ko:K02218 casein kinase 1 |
| miR-882     | 22 | -33.9 | 1 | /                                              | /                                       |
| miR-7b      | 23 | -32.3 | 1 | Ribosome biogenesis regulatory protein homolog | /                                       |
| miR-753b-5p | 21 | -29.9 | 1 | Immunogenic miracidial antigen 8I'             | /                                       |
| miR-750     | 22 | -33   | 1 | H <sup>+</sup> -transporting ATPase            | /                                       |
| miR-745a    | 20 | -31.6 | 1 | /                                              | /                                       |
| miR-71c     | 22 | -31.5 | 1 | /                                              | /                                       |
| miR-71b-5p  | 23 | -32.3 | 1 | hypothetical protein                           | /                                       |
| miR-7       | 24 | -32.3 | 1 | Ribosome biogenesis regulatory protein homolog | /                                       |
| miR-548p    | 23 | -29.2 | 1 | /                                              | /                                       |
| miR-548f    | 21 | -29.8 | 1 | NEDD8 precursor                                | /                                       |
| miR-520c-5p | 24 | -32.6 | 1 | hypothetical protein                           | /                                       |
| miR-488     | 19 | -25.2 | 1 | /                                              | /                                       |
| miR-452     | 24 | -27.5 | 1 | /                                              | /                                       |
| miR-4272    | 20 | -26   | 1 | hypothetical protein                           | /                                       |
| miR-4219-5p | 19 | -26.4 | 1 | /                                              | /                                       |
| miR-4214-5p | 20 | -30.5 | 1 | /                                              | /                                       |
| miR-421     | 20 | -29.3 | 1 | /                                              | /                                       |
| miR-4145-3p | 18 | -31.1 | 1 | /                                              | /                                       |
| miR-4126-5p | 22 | -28   | 1 | /                                              | /                                       |
| miR-4120-5p | 18 | -25.3 | 1 | hypothetical protein                           | /                                       |
| miR-4090-3p | 19 | -27.4 | 1 | /                                              | /                                       |
| miR-4032-5p | 20 | -27.7 | 1 | hypothetical protein                           | /                                       |

|              |    |       |   |                                                                                         |                             |
|--------------|----|-------|---|-----------------------------------------------------------------------------------------|-----------------------------|
| miR-4006f-5p | 20 | -26.7 | 1 | /                                                                                       | /                           |
| miR-4006b-5p | 22 | -27.1 | 1 | /                                                                                       | /                           |
| miR-4003a-3p | 21 | -26.8 | 1 | hypothetical protein                                                                    | /                           |
| miR-4001h-5p | 21 | -27.6 | 1 | hypothetical protein                                                                    | /                           |
| miR-36a      | 22 | -31.2 | 1 | Immunogenic miracidial antigen 8I'                                                      | /                           |
| miR-3668     | 21 | -26.5 | 1 | ATPase, F0 complex, subunit E,<br>mitochondrial, domain-containing protein              | /                           |
| miR-36-5p    | 23 | -34.5 | 1 | hypothetical protein                                                                    | /                           |
| miR-3654     | 21 | -29.8 | 1 | /                                                                                       | /                           |
| miR-3558-3p  | 20 | -31.7 | 1 | /                                                                                       | /                           |
| miR-3526     | 20 | -26.8 | 1 | /                                                                                       | /                           |
| miR-3495     | 20 | -28.4 | 1 | /                                                                                       | /                           |
| miR-3493     | 21 | -31.7 | 1 | /                                                                                       | /                           |
| miR-327      | 19 | -29.7 | 1 | DNA replication licensing factor MCM2<br>(Minichromosome maintenance protein 2 homolog) | /                           |
| miR-31-5p    | 23 | -35.1 | 1 | hypothetical protein                                                                    | /                           |
| miR-3148     | 24 | -27.3 | 1 | /                                                                                       | /                           |
| miR-3125     | 19 | -27   | 1 | /                                                                                       | /                           |
| miR-3115     | 18 | -25.6 | 1 | /                                                                                       | /                           |
| miR-3107*    | 18 | -28.5 | 1 | hypothetical protein                                                                    | /                           |
| miR-30c      | 21 | -27.3 | 1 | /                                                                                       | /                           |
| miR-30a      | 23 | -29.1 | 1 | /                                                                                       | /                           |
| miR-3080-5p  | 19 | -29.3 | 1 | Peptidase C2, calpain, domain-containing protein                                        | /                           |
| miR-308      | 20 | -30.9 | 1 | TRK-fused protein                                                                       | ko:K09292 protein TFG       |
| miR-3063*    | 23 | -33   | 1 | /                                                                                       | /                           |
| miR-3002     | 20 | -30.7 | 1 | Rab8                                                                                    | ko:K07976 Rab family, other |

|             |    |       |   |                                                       |                         |
|-------------|----|-------|---|-------------------------------------------------------|-------------------------|
| miR-2e-5p   | 22 | -28.6 | 1 | hypothetical protein                                  | /                       |
| miR-2b-5p   | 22 | -27.2 | 1 | Histone H2A                                           | /                       |
| miR-2989    | 18 | -28.7 | 1 | /                                                     | /                       |
| miR-2917    | 18 | -29   | 1 | /                                                     | /                       |
| miR-2812    | 20 | -29.2 | 1 | /                                                     | /                       |
| miR-27d     | 21 | -31.8 | 1 | /                                                     | /                       |
| miR-27b     | 21 | -31.2 | 1 | /                                                     | /                       |
| miR-279b*   | 18 | -27.9 | 1 | /                                                     | /                       |
| miR-277b-3p | 20 | -29.5 | 1 | Translocon-associated protein subunit alpha precursor | /                       |
| miR-2755    | 22 | -29.8 | 1 | /                                                     | /                       |
| miR-2703*   | 23 | -32   | 1 | /                                                     | /                       |
| miR-26a     | 22 | -25.9 | 1 | Histone H2A                                           | /                       |
| miR-2696    | 24 | -28   | 1 | /                                                     | /                       |
| miR-254     | 24 | -27.9 | 1 | hypothetical protein                                  | /                       |
| miR-2479    | 19 | -25.9 | 1 | /                                                     | /                       |
| miR-2444    | 22 | -28.4 | 1 | Egg protein CP111                                     | /                       |
| miR-2437    | 21 | -27.9 | 1 | /                                                     | /                       |
| miR-2434    | 23 | -28.1 | 1 | 26 proteasome complex subunit DSS1                    | /                       |
| miR-2421    | 22 | -29.3 | 1 | /                                                     | /                       |
| miR-240     | 25 | -30.4 | 1 | /                                                     | /                       |
| miR-2318    | 22 | -25.7 | 1 | /                                                     | /                       |
| miR-2304    | 20 | -30.4 | 1 | /                                                     | /                       |
| miR-2238b   | 18 | -27   | 1 | Saposin B domain-containing protein                   | /                       |
| miR-2235    | 21 | -25.9 | 1 | /                                                     | /                       |
| miR-222a*   | 19 | -29.4 | 1 | /                                                     | /                       |
| miR-2206-3p | 18 | -30   | 1 | Qprt                                                  | [EC:2.4.2.19] ko:K00767 |

|             |    |       |   |                                                |                                                            |
|-------------|----|-------|---|------------------------------------------------|------------------------------------------------------------|
|             |    |       |   |                                                | nicotinate-nucleotide pyrophosphorylase<br>(carboxylating) |
| miR-214*    | 19 | -28.1 | 1 | /                                              | /                                                          |
| miR-20a-2*  | 22 | -28.8 | 1 | hypothetical protein                           | /                                                          |
| miR-200c    | 23 | -28.3 | 1 | /                                              | /                                                          |
| miR-1b      | 23 | -28.4 | 1 | /                                              | /                                                          |
| miR-1a      | 24 | -29.5 | 1 | /                                              | /                                                          |
| miR-196b    | 21 | -29.5 | 1 | /                                              | /                                                          |
| miR-190b    | 24 | -32.1 | 1 | /                                              | /                                                          |
| miR-190-3p  | 22 | -29.9 | 1 | ribosomal protein S12                          | ko:K02951 small subunit ribosomal protein<br>S12e          |
| miR-186     | 23 | -32.7 | 1 | /                                              | /                                                          |
| miR-183     | 23 | -29.7 | 1 | hypothetical protein                           | /                                                          |
| miR-1814    | 20 | -28.8 | 1 | 26 proteasome complex subunit DSS1             | /                                                          |
| miR-1757    | 21 | -29.2 | 1 | roadblock                                      | ko:K01509 adenosinetriphosphatase                          |
| miR-1738    | 23 | -39.7 | 1 | Sad1/unc-84-like protein 2                     | /                                                          |
| miR-1700    | 23 | -30.6 | 1 | /                                              | /                                                          |
| miR-17      | 23 | -28.5 | 1 | hypothetical protein                           | /                                                          |
| miR-1689    | 20 | -35.1 | 1 | /                                              | /                                                          |
| miR-1600    | 20 | -28.1 | 1 | hypothetical protein                           | /                                                          |
| miR-1568    | 18 | -35   | 1 | Sad1/unc-84-like protein 2                     | /                                                          |
| miR-155*    | 20 | -27.7 | 1 | /                                              | /                                                          |
| miR-152     | 21 | -29.6 | 1 | Cupin, RmlC-type, domain-containing protein    | /                                                          |
| miR-1422i   | 20 | -31.1 | 1 | Cell differentiation protein rcd1              | /                                                          |
| miR-1422e   | 25 | -35.4 | 1 | Alpha-taxilin                                  | /                                                          |
| miR-1421af* | 19 | -30.8 | 1 | Cathepsin B-like cysteine proteinase precursor | [EC:3.4.22.-]                                              |

|            |    |       |   |                                                                         |                                                       |
|------------|----|-------|---|-------------------------------------------------------------------------|-------------------------------------------------------|
| miR-140    | 22 | -29.8 | 1 | Peptidase C2, calpain, domain-containing protein                        | /                                                     |
| miR-1370   | 18 | -28.1 | 1 | /                                                                       | /                                                     |
| miR-1358   | 20 | -32.9 | 1 | hypothetical protein                                                    | /                                                     |
| miR-1357   | 19 | -25   | 1 | /                                                                       | /                                                     |
| miR-1339*  | 26 | -29.9 | 1 | hypothetical protein                                                    | /                                                     |
| miR-130b   | 23 | -33.1 | 1 | /                                                                       | /                                                     |
| miR-1278   | 22 | -29.9 | 1 | SAM domain-containing protein                                           | /                                                     |
| miR-126-5p | 19 | -30.2 | 1 | /                                                                       | /                                                     |
| miR-126-3p | 22 | -31.2 | 1 | /                                                                       | /                                                     |
| miR-10c    | 22 | -29.8 | 1 | proteasome (prosome, macropain) subunit, beta type, 6                   | [EC:3.4.25.1] ko:K02738 20S proteasome subunit beta 1 |
| miR-101a   | 22 | -33.2 | 1 | putative protein affecting Mg <sup>2+</sup> /Co <sup>2+</sup> transport | ko:K06195 ApaG protein                                |
| miR-101    | 21 | -31.5 | 1 | putative protein affecting Mg <sup>2+</sup> /Co <sup>2+</sup> transport | ko:K06195 ApaG protein                                |
| lin-4      | 20 | -31   | 1 | Caltractin (Centrin)                                                    | /                                                     |
| let-7f     | 22 | -28.1 | 1 | /                                                                       | /                                                     |
