# Supplementary material for: Characterization of MicroRNAs from Orientobilharzia turkestanicum, a Neglected Blood Fluke of Human and Animal Health Significance
Source: PubMed Central journal article supplement (PMC3468544; doi:10.1371/journal.pone.0047001), 2012-10-10
Supplement: pone.0047001.s002.pdf [file pone.0047001.s002.pdf]

## Additional file 2. Complementary Structure of miRNA with their star sequences

| Name                      | Target        | Mfe<br>(kcal/mol) | P-value  | Complementary Structure                                                                       |
|---------------------------|---------------|-------------------|----------|-----------------------------------------------------------------------------------------------|
| <b>NADH dehydrogenase</b> |               |                   |          |                                                                                               |
| miR-4144-3p               | SJFCE3378.004 | -30.2             | 0.00372  | target 5' G G 3'<br>CUGGUGAUGCAAGAUU<br>GACUACUACGUUCUGA<br>miRNA 3' G A 5'                   |
| miR-1837                  | SJFCE2420.002 | -35.4             | 0.001062 | target 5' C U C C 3'<br>UG GUCAACAGUCCCU CUCA<br>AC CAGUUGUCAGGGA GAGU<br>miRNA 3' UCUU CU 5' |
| miR-125b*                 | SJFCA2649.001 | -33.2             | 0.003403 | target 5' A U G 3'<br>CCCAAGAGCUUG CUUG<br>GGGUUCUCGGAC GAAC<br>miRNA 3' CCA U A 5'           |
| miR-36a*                  | SJFCE3371.004 | -30.2             | 0.008135 | target 5' C C U 3'<br>GAACCAGGUACAAGA AUUCA<br>UUUGGUUCAUGUUCU UAAGU<br>miRNA 3' 5'           |

| ATPase      |               |       |          |                                                                                                 |
|-------------|---------------|-------|----------|-------------------------------------------------------------------------------------------------|
| miR-3666    | SJFCE5459     | -30.6 | 0.002343 | target 5' G G G 3'<br>CGCGCGUUU CGUGUGUG UGCU<br>GCGCGUAGA GUGUACGU ACGG<br>miRNA 3' A U G U 5' |
| miR-4115-5p | SJFCE3770.010 | -30   | 0.009561 | target 5' U C C 3'<br>UGG GAGUGCAGACCA<br>GCC CUCAUGUCUGGU<br>miRNA 3' UUUCUU U 5'              |
| miR-4038-3p | SJFCE3300.005 | -27.9 | 0.003849 | target 5' G A A 3'<br>AGAUUAACCGAGU CAAUG<br>UCUAGUUGGUUCA GUUAC<br>miRNA 3' C 5'               |
| miR-3668    | SJFCE1459     | -26.5 | 0.008551 | target 5' G G A 3'<br>UUUACGGA CUCUGCGUUU<br>AAAUGUCU GAGAUGUAAA<br>miRNA 3' UA A 5'            |
| miR-3559-3p | SJFCE2856.001 | -29.6 | 0.005681 | target 5' A C G 3'<br>UGAUAUGACUCAGUUU CU<br>GCUGUACUGAGUCAGA GA<br>miRNA 3' G U 5'             |

|                                        |               |       |          |                    |                                              |                    |
|----------------------------------------|---------------|-------|----------|--------------------|----------------------------------------------|--------------------|
| miR-503                                | SJFCE2163.001 | -31.4 | 0.001014 | target 5' G C 3'   | GCUGUUUCGCGUGC<br>UGACAAGGGCGACG             | miRNA 3' AAA AU 5' |
| <b>Transcription initiation factor</b> |               |       |          |                    |                                              |                    |
| miR-369-3p                             | SJFCA3197.003 | -29.6 | 0.008818 | target 5' U A 3'   | UGUCAACGGUGUGUUAUU<br>ACAGUUGCUCACUAAUAA     | miRNA 3' UU 5'     |
| miR-139                                | SJFCA3498.001 | -32.6 | 0.001443 | target 5' A U A 3' | GGGACAU UGCACUGGA<br>CCUUGUG ACGUGACCU       | miRNA 3' A U C 5'  |
| miR-4082-3p                            | SJFCE1620     | -30.5 | 0.008156 | target 5' A C 3'   | AGUUCAGCUCCAACUG<br>UCAAGUUGAGGUUGGC         | miRNA 3' AA 5'     |
| miR-4148-5p                            | SJFCA0288     | -33.6 | 0.002135 | target 5' U A G 3' | GUGU CCGGUGCACG CUCU<br>CACA GGUCACGUGC GAGA | miRNA 3' U G 5'    |

| Splicing factor |               |       |          |                     |                                                   |
|-----------------|---------------|-------|----------|---------------------|---------------------------------------------------|
| miR-23a*        | SJFCA0598     | -31.4 | 0.008199 | target 5' A G A 3'  | UG GUCGCCAGAAUCC<br>GC UAGUGGUCUUUAGG             |
|                 |               |       |          | miRNA 3' UUUCA G 5' |                                                   |
| miR-767-3p      | SJFCE3755.003 | -33.4 | 0.005437 | target 5' A C G 3'  | GAAACCAU GGGUA GUGGUGGU<br>UUUUGGUA CCCGU CAUCAUG |
|                 |               |       |          | miRNA 3' C A U 5'   |                                                   |
| miR-463         | SJFCE3755.003 | -30.5 | 0.00905  | target 5' G A 3'    | ACCCGGUUCUGUCG<br>UGGGUUAAGAGCAGU                 |
|                 |               |       |          | miRNA 3' GA AGU 5'  |                                                   |
| miR-598         | SJFCE3755.014 | -30   | 0.004638 | target 5' A A 3'    | UGGCGGUGGACGUGAC<br>ACUGCUAUUUGCACUG              |
|                 |               |       |          | miRNA 3' CUAU 5'    |                                                   |
| miR-2881        | SJFCA0344     | -43.3 | 0.000057 | target 5' C C 3'    | CCACCACCUCCGCCCC<br>GGUGGUGGGGGCGGGG              |
|                 |               |       |          | miRNA 3' GUA U 5'   |                                                   |

| Signal transduction    |               |       |          |                                                                                                   |
|------------------------|---------------|-------|----------|---------------------------------------------------------------------------------------------------|
| miR-532-3p             | SJFCE3560.007 | -35.9 | 0.002175 | target 5' A C C A U 3'<br>GCAAGCC UGGGU G GG GAGG<br>CGUUCGG ACCCA C CC CUCC<br>miRNA 3' A A A 5' |
| miR-236                | SJFCE3743.002 | -31.7 | 0.003428 | target 5' C C A A 3'<br>AUCCUCGUU UCGA CAGUAUUG<br>UAGGAGUAA AGCU GUCAUAAU<br>miRNA 3' A U A 5'   |
| Growth factor receptor |               |       |          |                                                                                                   |
| miR-1942               | SJFCA2712.001 | -31.7 | 0.008911 | target 5' A U 3'<br>ACCGGAUGGGGCAUUCG<br>UGGUCUACUCUGUAAGU<br>miRNA 3' GUA 5'                     |
| miR-71a                | SJFCA3391.005 | -35   | 0.008505 | target 5' A C 3'<br>UUCAUCUUACUACUAGUGUUU<br>AAGUAGUGAUGGUCGAGA<br>miRNA 3' AAGU 5'               |
| Zinc finger protein    |               |       |          |                                                                                                   |
| miR-4020b-5p           | SJFCA0201     | -33.6 | 0.001724 | target 5' C A 3'<br>UAUGUACCGCC ACCACC<br>GUACGUGGUGG UGUGG<br>miRNA 3' U 5'                      |

|                    |               |       |          |                     |         |
|--------------------|---------------|-------|----------|---------------------|---------|
| miR-92e-5p         | SJFCA0201     | -36.2 | 0.00102  | target 5' C         | A 3'    |
|                    |               |       |          | CUAUGUACCGCC ACCACC |         |
|                    |               |       |          | GGUACGUGGUGG UGGUGG |         |
|                    |               |       |          | miRNA 3' U          | C 5'    |
| miR-252            | SJFCA0201     | -36.8 | 0.000521 | target 5' C         | C 3'    |
|                    |               |       |          | CCUGCGGCACCAGUUC    |         |
|                    |               |       |          | GGGCGUCGUGGUCAAG    |         |
|                    |               |       |          | miRNA 3' A          | AC 5'   |
| miR-4150-5p        | SJFCA0510     | -35.7 | 0.000999 | target 5' G         | G 3'    |
|                    |               |       |          | UCACAGUCGUUAGUUAUC  |         |
|                    |               |       |          | AGUGUCAGCGUAUCGAUAG |         |
|                    |               |       |          | miRNA 3'            | 5'      |
| miR-4101-3p        | SJFCE3594.008 | -28.5 | 0.007164 | target 5' C G       | G 3'    |
|                    |               |       |          | UCCA AUUACUACGUUCA  |         |
|                    |               |       |          | GGGU UAUUGAUGUAGGU  |         |
|                    |               |       |          | miRNA 3' G          | 5'      |
| <b>Egg protein</b> |               |       |          |                     |         |
| miR-320c           | SJFCE2139.001 | -31.1 | 0.006281 | target 5' U         | A 3'    |
|                    |               |       |          | CCCUUCAAUCCGGC      |         |
|                    |               |       |          | GGGAGAGUUGGGUCG     |         |
|                    |               |       |          | miRNA 3'            | AAAA 5' |

|                           |               |       |          |                                                                            |                  |
|---------------------------|---------------|-------|----------|----------------------------------------------------------------------------|------------------|
| miR-2444                  | SJFCE3676.010 | -28.4 | 0.009058 | target 5' U U C 3'<br>GAACAAUAAC ACAGGACAAA<br>UUUGUUUGUUG UGUUCUGUUU      | miRNA 3' U 5'    |
| miR-2807c*                | SJFCE3845.025 | -28.8 | 0.008918 | target 5' A U G 3'<br>GGUC GACGGUGUUGGAUGAUG<br>UCAG UUGUUACGGUUUACUAC     | miRNA 3' G 5'    |
| <b>Heat shock protein</b> |               |       |          |                                                                            |                  |
| miR-36c                   | SJFCE2899.003 | -30.7 | 0.005237 | target 5' G C G 3'<br>GAGU GUCUGCC GGUGG<br>CUUA CAGACGG CCACC             | miRNA 3' A G 5'  |
| miR-486-5p                | SJFCE2701.002 | -31.8 | 0.007241 | target 5' A U A C 3'<br>UUGGGGC A G UUAGUACAGGA<br>AGCCCCG U C AGUCAUGUCCU | miRNA 3' G 5'    |
| miR-669g                  | SJFCA3842.001 | -32.1 | 0.001205 | target 5' U G 3'<br>GUAGUUGCACACGGUCCAG<br>UAUCAGUGUGUGUUAGGUU             | miRNA 3' ACGU 5' |
